1

## 2 Using connectivity to identify climatic drivers of local adaptation

3 Stewart L. Macdonald\*<sup>1,2</sup>, John Llewelyn<sup>1,2</sup>, & Ben L. Phillips<sup>3,1</sup>

4

5

6

7

8

9

1. Centre for Tropical Biodiversity and Climate Change, James Cook University, Townsville,  
10 Qld, 4811, Australia. [stewart.macdonald@my.jcu.edu.au](mailto:stewart.macdonald@my.jcu.edu.au)

11

2. CSIRO Land and Water Flagship, Townsville, Qld, Australia

12

3. School of BioSciences, University of Melbourne, Vic, Australia. [phillipsb@unimelb.edu.au](mailto:phillipsb@unimelb.edu.au)

13

\* Author and address for correspondence

14

15

16

17

18

Running title: Identifying drivers of local adaptation

19

20

Statement of authorship: BLP and SLM designed research; SLM, JL, and BLP

21

collected data; SLM & BLP performed analyses and wrote the manuscript; all authors

22

contributed to revisions.

23

24

Keywords: local adaptation, climate, connectivity, gene flow.

25

26

27

Revised manuscript, 24 August 2017

28

29

30

31

32

33 **Abstract**

34 *This preprint has been reviewed and recommended by Peer Community*

35 *In Evolutionary Biology (<http://dx.doi.org/10.24072/pci.evolbiol.100034>).*

36 Despite being able to conclusively demonstrate local adaptation, we are still often  
37 unable to objectively determine the climatic drivers of local adaptation. Given the  
38 rapid rate of global change, understanding the climatic drivers of local adaptation is  
39 vital. Not only will this tell us which climate axes matter most to population fitness,  
40 but such knowledge is critical to inform management strategies such as translocation  
41 and targeted gene flow. While simple assessments of geographic trait variation are  
42 useful, geographic variation (and its associations with environment) may represent  
43 plastic, rather than evolved, differences. Additionally, the vast number of trait–  
44 environment combinations makes it difficult to determine which aspects of the  
45 environment populations adapt to. Here we argue that by incorporating a measure of  
46 landscape connectivity as a proxy for gene flow, we can differentiate between trait–  
47 environment relationships underpinned by genetic differences versus those that reflect  
48 phenotypic plasticity. By doing so, we can rapidly shorten the list of trait–  
49 environment combinations that may be of adaptive significance. We demonstrate how  
50 this reasoning can be applied using data on geographic trait variation in a lizard  
51 species from Australia’s Wet Tropics rainforest. Our analysis reveals an  
52 overwhelming signal of local adaptation for the traits and environmental variables we  
53 investigated. Our analysis also allows us to rank environmental variables by the  
54 degree to which they appear to be driving local adaptation. Although encouraging,  
55 methodological issues remain: we point to these issue in the hope that the community  
56 can rapidly hone the methods we sketch here. The promise is a rapid and general  
57 approach to identifying the environmental drivers of local adaptation.



## 59 **Introduction**

60 It is only recently that we have begun to appreciate the speed with which evolution  
61 can happen; not only over relatively short timespans (e.g., 1, 2-4), but also at small  
62 spatial scales (5). Rapid local adaptation has been recorded in response to a wide suite  
63 of environmental drivers, including invasive species, and pollution (6). We expect  
64 climate to also be a major driver of local adaptation (e.g., 7, 8), and understanding the  
65 way in which species respond to climate is of increasing importance because  
66 anthropogenic climate change is proceeding at such a rate that there are concerns that  
67 many species will be unable to evolve rapidly enough to avoid extinction (9, 10).

68

69 Evolution typically optimizes phenotypes, but the optimum will vary through both  
70 time and space (11, 12), in turn leading to populations ('demes') that have, on average,  
71 higher fitness in their home environment than an immigrant would: local adaptation.  
72 While adaptive optima for traits almost always vary geographically, it does not follow  
73 that all geographic trait variation is due to local adaptation. Geographic trait variation  
74 can arise due to other factors, such as phenotypic plasticity (including developmental  
75 plasticity and maternal effects), neutral clines, and environmental factors (such as  
76 geographic variation in fitness-reducing parasites). These factors can give the  
77 appearance of local adaptation (10, 11), complicating our identification of climate-  
78 relevant adaptive variation.

79

80 To circumvent these issues, evolutionary biologists use experimental approaches to  
81 demonstrate local adaptation (12, 13). Experiments designed to detect local adaptation  
82 typically utilise one of two techniques: 1) reciprocal transplants, which are done *in*  
83 *situ*, and are considered the gold standard for demonstrating local adaptation; or 2)

84 common garden experiments, which are usually done in the lab where it is easier to  
85 control each environmental variable (12). Both of these techniques can be difficult,  
86 for reasons of time, expense, logistics, or ethics. This difficulty increases as the  
87 number of separate demes and environmental variables to be tested increases and as  
88 the generation time of the organism increases (12). Additionally, although reciprocal  
89 transplants will detect signs of local adaptation, they are not necessarily suited to  
90 identifying the environmental drivers of that local adaptation (14). This is because *in*  
91 *situ* reciprocal transplants necessarily encompass all the environmental variables that  
92 differ between the transplant locations. Lab-based common garden approaches may,  
93 in principle, be more suited to identifying environmental drivers (because the  
94 environment may be under a degree of control), but in practice it often remains  
95 impossible to identify the environmental drivers of trait variation seen in the wild.  
96 Thus, the best experimental tools we have for studying local adaptation are  
97 demanding in terms of time and cost, and are unsuitable for assigning environmental  
98 drivers (such as climate variables) to adaptive variation. If we are looking for climate-  
99 driven local adaptation, this is a problem: we want to know which climate variable or  
100 variables are the main drivers of adaptation, and we urgently need this information for  
101 many species.

102

103 By definition, local adaptation has a genetic basis and is consequently weakened by  
104 high levels of gene flow (11, 15, 16). Demes with excessive inward gene flow are  
105 therefore likely to be less optimally adapted, causing an observable mismatch between  
106 optimal and actual phenotypes. Some examples of this are birds dispersing and  
107 producing clutch sizes that are not optimised for the habitat quality in which they are  
108 now nesting (17), larval salamander colouration not matching streambed colouration

109 due to high levels of gene flow from nearby but predator-free streams (18), and stick  
110 insects in smaller habitat patches having non-cryptic colouration when the  
111 surrounding patches are larger and environmentally dissimilar (19). These  
112 observations of "migrant load" suggest an alternative technique for identifying and  
113 assessing local adaptation. First, we look across populations for relationships between  
114 the environment (e.g., mean annual temperature) and traits (e.g., morphology,  
115 physiology). By themselves, these relationships are not sufficient evidence of local  
116 adaptation — they could also be caused by phenotypic plasticity. Second, knowing  
117 that local adaptation is hindered by gene flow, we can look at whether gene flow  
118 diminishes the environmental effect. With some caveats (discussed below), in cases  
119 where data on gene flow are absent (which is often the case), habitat connectivity can  
120 be used as a substitute for gene flow. Trait–environment relationships that are strong,  
121 but which are also weakened by connectivity, are indicative of trait–environment  
122 relationships that have a genetic basis. In a statistical model, this idea would be  
123 represented as follows:

$$124 \quad \text{Trait}_i = A + B_{env} \times \text{Env} + B_{conn} \times \text{Conn} + B_{int} \times \text{Env} \times \text{Conn} + \text{error}_i$$

125 Where:

126  $\text{trait}_i$  = trait value for individual  $i$

127  $A$  = intercept

128  $B_{env}$  = coefficient of the environmental variable

129  $\text{Env}$  = environmental variable (e.g., annual mean temperature) at the  
130 individual's site

131  $B_{conn}$  = coefficient of connectivity

132  $\text{Conn}$  = connectivity at the individual's site

133  $B_{int}$  = coefficient of the interaction between  $\text{Env}$  and  $\text{Conn}$

134  $error_i$  = deviation between expected value and trait value of individual  $i$

135 Which, with slight rearrangement, can also be expressed as:

136 
$$\text{Trait}_i = A + (B_{env} + B_{int} \times \text{Conn}) \times \text{Env} + B_{conn} \times \text{Conn} + error_i$$

137 showing that the slope of the relationship between the trait and the environment now  
138 depends on the connectivity value. When the signs of  $B_{env}$  and  $B_{int}$  are in opposition,  
139 then we have a situation in which the relationship between the trait and the  
140 environment diminishes as connectivity increases.

141

142 If we now collect data on a large number of trait–environment relationships, and their  
143 interaction with connectivity, we can imagine several possible patterns emerging.

144 These possibilities are depicted in Figure 1. Each panel represents a possible  
145 relationship between trait–environment coefficients (along the x-axis) and the  
146 interaction between environment and connectivity (y-axis). Panel A shows a set of  
147 trait–environment relationships that vary in strength, but that are not influenced by  
148 connectivity (i.e., no environment–connectivity interaction). This pattern is indicative  
149 of a system in which trait–environment relationships are predominantly driven by  
150 plastic responses of traits to their environment (i.e., traits always match the local  
151 environment, regardless of the level of inward gene flow). Panel B shows a system in  
152 which trait–environment relationships are eroded by connectivity: increased  
153 connectivity diminishes the relationship between the environment and the trait. In this  
154 situation, the interaction between the environmental variable and connectivity is  
155 negative when the environmental coefficient is positive (i.e., greater connectivity  
156 causes the environmental coefficient to decrease towards zero; bottom-right  
157 quadrant), and positive when the environmental coefficient is negative (i.e., greater  
158 connectivity causes the environmental coefficient to increase towards zero; top-left

159 quadrant). This is the pattern we would expect if there is a genetic basis to the trait–  
160 environment relationship, such as is exhibited by local adaptation. Panel C shows the  
161 situation where the effect of the environment tends to be enhanced by connectivity.  
162 This pattern might arise in organisms that are highly mobile and can actively move to  
163 their ideal environment, thus avoiding the selective pressures that would lead to local  
164 adaptation.

165  
166 Understanding how species respond to specific aspects of their environment is vital if  
167 we are to have any hope of halting the current rapid loss of biodiversity. Climate  
168 change is undoubtedly one of the biggest threats to global biodiversity (20, 21), and  
169 conservation biologists are looking to a variety of techniques to assess and help  
170 mitigate the impacts of climate change on vulnerable species (22-24). One technique  
171 that is likely to see increasing use is targeted, or assisted, gene flow [TGF; for review,  
172 see (22, 25)]. This technique involves the spatial redistribution of long-standing  
173 adaptations, and acts to increase genetic diversity in recipient populations, thereby  
174 bolstering capacity for evolutionary adaptation (10, 22, 24, 25). When applying TGF  
175 to help species adapt to climate change, we need to find an existing location that  
176 matches the future climate at our recipient site, and then translocate animals from that  
177 source location. It is a simple idea, but climate is multidimensional and species will  
178 not be adapting equally to each climate axis: is a difference of 0.5°C in mean  
179 temperature more important than a difference of 100mm in annual rainfall? The  
180 answer depends upon which aspects of climate (hereafter “climatic axes”) have the  
181 strongest influence on fitness.

182

183 Here we explore the idea of using connectivity to infer local adaptation. To do this we  
184 develop a case study of a lizard species from northern Australia. We use this system



185 to examine the relationship, across sites, between traits and climatic variables. We  
186 assess how habitat connectivity affects these relationships and use the interaction  
187 between the environmental variable and connectivity to rank trait–environment  
188 combinations. In doing so, we reveal a set of trait–environment relationships that  
189 appears to be dominated by local adaptation.

190

191

## 192 **Methods**

### 193 Study species and site selection

194 The Rainforest Sunskink (*Lampropholis coggeri*) is a small (snout–vent length up to  
195 45 mm), diurnal scincid lizard restricted to the rainforests of the Wet Tropics region  
196 of northeastern Australia (26). The rainforests of this region cover a wide range of  
197 environmental conditions, spanning significant elevation (0–1600 m ASL),  
198 precipitation (annual mean precipitation of 1432–8934 mm, not including input from  
199 cloud stripping), and temperature (annual mean temperature of 16.3–25.8°C)  
200 gradients. This heliothermic skink is active year-round, often seen basking in patches  
201 of sunlight on the rainforest floor. Lizards were captured by hand from sites that were  
202 selected to maximize the environmental heterogeneity sampled (Fig. 2).

203

204 Morphological measurements were obtained from 532 skinks from 32 sites.

205 Physiological measurements were obtained from a smaller subset of these lizards: 259  
206 skinks from 12 sites. At each site, 8–20 skinks were caught per collecting trip.

207 Following capture, skinks were transported to James Cook University (JCU) in

208 Townsville for trait measurement. All procedures involving lizards were approved by

209 the JCU animal ethics committee (projects A1976 and A1726).

210

211 Physiological trials

212 Physiological trials commenced within seven days of skinks being collected from the  
213 field; skinks being used only for morphology were measured and released back at  
214 their point of capture within seven days. The following measures were taken from  
215 each skink (n = 259) during laboratory trials: critical thermal minimum (CT<sub>min</sub>),  
216 critical thermal maximum (CT<sub>max</sub>), thermal-performance breadth for sprinting  
217 (breadth<sub>80</sub>), maximum sprint speed (R<sub>max</sub>), temperature at which sprint speed is  
218 optimized (T<sub>opt</sub>), active body temperature as measured in a thermal gradient  
219 (T<sub>active</sub>), and desiccation rate (des) (see Table S1 for further details). Details of trait  
220 measurement procedures are detailed elsewhere (see 27, 28).

221

222 Morphological measurements

223 The following measurements were taken from each skink (n = 532) using digital  
224 calipers: head width (HeadW); head length (HeadL); interlimb length (ILimbL);  
225 hindlimb length (HindLL). Left and right measurements were averaged to obtain one  
226 measurement for that trait. We also recorded snout–vent length (SVL), total length,  
227 and mass (see Table S1 for further details). All measurements were taken by one  
228 person (SLM) to minimize observer bias. All morphological variables were log-  
229 transformed prior to regression analyses.

230

231 Climatic variables, and connectivity

232 Because our study aimed to assess adaptation to local climate, various temperature  
233 and precipitation variables were extracted for each site (see Table S2 for details). We  
234 considered both means and extremes. It is important to consider climatic extremes,  
235 because temperature extremes may be increasing faster than mean temperatures (29),  
236 and selection may often occur during extreme weather events (30). Many  
237 environmental variables are highly correlated (27), so only the less-derived variables  
238 were used in analyses, specifically: annual mean precipitation (AMP); seasonality of  
239 precipitation (Pcov); precipitation of the driest quarter (Pdry); annual mean  
240 temperature (AMT); coefficient of variation of temperature (Tcov); average minimum  
241 daily temperature (Tmin); average maximum daily temperature (Tmax); average  
242 variance of daily maximum temperature (TmaxVar); and average variance of daily  
243 Tmin (TminVar).

244

245

246 Our connectivity index was designed to capture the flux of individuals through a  
247 location and is detailed in (31). Briefly, it is a measure of habitat suitability for our  
248 focal skink species, averaged over space using a species-specific estimate of dispersal  
249 potential. This approach is reasonable for any species exhibiting diffusive dispersal,  
250 and similar techniques (though different spatial-weighting functions) can be used for  
251 species exhibiting non-diffusive dispersal. As our species is an obligate rainforest-  
252 dweller, grid cells in the landscape that are rainforest and that are surrounded by  
253 rainforest have high connectivity indices, while grid cells of rainforest surrounded by  
254 non-rainforest matrix have low indices. See Table S2 for further details on all  
255 variables, and Figure S1 for correlations between all variables.

256

## 257 Analysis

258 Our analysis aimed to assess: 1) the relationship, across sites, between each trait and  
259 each environmental variable; and 2) how connectivity affected each of these  
260 relationships (i.e., the interaction between connectivity and environment). To allow  
261 comparison of coefficients across variables, and to make interaction effect-sizes  
262 meaningful, all trait and environmental variables were standardized so they had a  
263 mean of 0 and a standard deviation of 1. Linear models were fitted for each pair of  
264 environment–trait variables, with all models including the effect of lizard body size  
265 and sex, as well as the interaction between environment and connectivity:

$$266 \text{ trait}_i = A + B_{svl} \times \text{SVL}_i + B_{sex} \times \text{Sex}_i + B_{env} \times \text{Env} + B_{conn} \times \text{Conn} + B_{int} \times \text{Env} \times \text{Conn} + \text{error}_i$$

267 Where:

268  $\text{trait}_i$  = standardized trait value of interest for lizard  $i$

269  $A$  = intercept

270  $B_{svl}$  = coefficient of SVL

271 SVL = lizard snout–vent length, to control for effect of body size

272  $B_{sex}$  = coefficient of Sex  
273 Sex = lizard sex (this species is sexually dimorphic in some morphological  
274 traits)  
275  $B_{env}$  = coefficient of environmental variable  
276 Env = environmental variable (e.g., annual mean temperature) at the lizard's  
277 site  
278  $B_{conn}$  = coefficient of connectivity  
279 Conn = connectivity index at the lizard's site  
280  $B_{int}$  = coefficient of interaction between Env and Conn  
281  $error_i$  = deviation between expected value and trait value of lizard  $i$   
282

283 A score for ranking the strength of local adaptation ( $L$ ) was then calculated as:

284 
$$L = -B_{env} \times B_{int}$$

285 If the signs of the two coefficients ( $B_{env}$  and  $B_{int}$ ) are opposite (which indicates an  
286 trait–environmental relationship that is diminished by increasing connectivity, i.e.,  
287 evidence for local adaptation),  $L$  will be positive. If the signs are the same (which  
288 indicates an environmental effect being enhanced by increased connectivity, a  
289 situation not consistent with local adaptation),  $L$  will be negative. Thus, higher  
290 numbers on this scale equate to stronger evidence for local adaptation in that  
291 environment–trait pair. This score can, in theory, range from  $-\infty$  to  $+\infty$ . Once many  
292 environment–trait combinations have been assessed, the coefficients for all pairs can  
293 be plotted (see Fig. 1). As described in the Introduction, in a system dominated by  
294 local adaptation, we expect to see a negative relationship between  $B_{env}$  and  $B_{int}$  (Fig.  
295 1B). All analyses were conducted in R v3.2 (32).

296

## 297 **Results**

298 There was substantial variation in the effect of environment ( $B_{env}$ ) and its interaction  
299 with connectivity ( $B_{int}$ ) across climate and trait variables, with  $B_{env}$  ranging from -1.8  
300 to 1.61, and  $B_{int}$  ranging from -0.73 to 0.78 (Fig. 3). Despite this variation, a clear  
301 pattern is evident, with most points in Figure 3 appearing in the top-left or bottom-  
302 right quadrants: the quadrants in which the two coefficients have opposing signs, and  
303 where we would expect points to fall if trait–environment relationships have a genetic  
304 basis. Across these trait–environment combinations there is a distinct negative linear  
305 trend (slope= -0.36,  $p < 0.001$ ). It is especially noteworthy that the trait–environment  
306 pairs with the largest coefficients are in the two quadrants indicative of local  
307 adaptation.

308

309 Overall, physiological traits showed substantially stronger environmental effects (i.e.,  
310 larger values of  $B_{env}$ ) than did morphological traits, with the largest environmental  
311 effects being exhibited by CTmin (AMP: -1.80; Tmax: 1.35; Pdry: -1.55) and CTmax  
312 (Pdry: 1.61; AMP: 1.21). Physiological traits also showed stronger interactions  
313 between environmental effects and connectivity, again with CTmin and CTmax  
314 showing the largest interactions. These trends are apparent when we examine our  
315 index of local adaptation,  $L$ . Figure 4 shows a heatmap of all trait–environment pairs,  
316 ranked via reciprocal averaging according to the strength of their local adaptation  
317 index. The trait–environment pairs that show the strongest signature of local  
318 adaptation appear at the top-left in red. There is a rough divide, with most of the  
319 physiological traits on the left and most of the morphological traits on the right. The  
320 exceptions are the physiological traits Topt and Rmax, which appear at the far right of  
321 the figure.

322

323 The two environmental variables that produced the strongest effects (topmost rows in  
324 Fig 4) were both precipitation related: annual mean precipitation (AMP) and  
325 precipitation of the driest quarter (Pdry). In our system, AMP and Pdry are both  
326 highly correlated with connectivity (see Fig. S1). This is expected, because our  
327 connectivity index is largely a measure of where rainforest is, and the distribution of  
328 rainforest in our study region is driven to a large degree by rainfall.

329

330

### 331 **Discussion**

332 Understanding relationships between traits and the environment will help us plan  
333 management strategies, such as targeted gene flow (TGF), that can mitigate the

334 impact of climate change on vulnerable species. Numerous studies have looked for  
335 (and found) trait–environment relationships (e.g., 18, 19, 33, 34-36), but the  
336 interpretation of these associations is plagued with uncertainty: are they associations  
337 due to local adaptation, neutral clines, habitat choice, or plasticity? By acknowledging  
338 that gene flow undermines adaptation, we can incorporate connectivity (a proxy for  
339 the flux of genes) into our analysis, and in doing so, separate those relationships due  
340 to fixed genetic differences, from those due to plasticity or habitat choice.

341

#### 342 Local adaptation

343 In the trait–environment combinations we assessed, physiological traits typically  
344 showed a substantially stronger effect of environment ( $B_{env}$ ) than did morphological  
345 traits, with the largest environmental effects shown in CTmax and CTmin (Figs. 3 &  
346 4). Physiological traits also generally showed stronger environment–connectivity  
347 interactions ( $B_{int}$ ), again with CTmin and CTmax showing the largest interactions.  
348 Overall, physiological traits generally showed stronger evidence of local adaptation  
349 than did morphological traits. This result is intuitive: we would expect an ectotherm’s  
350 physiological traits to be under strong selection from climate (37-39), but the fitness  
351 link between morphology and climate is much less clear. Had we also included some  
352 environmental variables that had a clearer bearing on morphology, we might have  
353 detected stronger trait–environment relationships for morphology. For example,  
354 skinks that occur in rockier habitats show various morphological adaptations to that  
355 environment (40). Including a measure of rockiness in our set of environmental  
356 variables might have allowed us to detect a signal of local adaptation for limb length.  
357 Here, however, our focus is on climatic aspects of the environment.

358



359 Of the environmental variables used, our analysis suggests that precipitation is a very  
360 strong driver of local adaptation, even in thermal traits that might not seem obviously  
361 related to precipitation (e.g., CTmin, CTmax). Although this may seem a surprising  
362 result, precipitation has been shown to directly affect growth rate, body temperature,  
363 activity patterns, and thermoregulatory opportunities in lizards (38, 41-45). Wetter  
364 areas also have higher thermal inertia (and so lower cyclical thermal fluctuations  
365 (46)), and changed environmental variance in temperature potentially has a strong  
366 influence on thermal limits (47). Additionally, Bonebrake and Mastrandrea (48) found  
367 that changes in precipitation can significantly affect modeled fitness and performance  
368 curves. Finally, comparative analyses also suggest that precipitation can influence  
369 thermal traits in many species (38). Thus, although the mechanisms linking  
370 precipitation to thermal limits are diffuse and poorly resolved, they do exist, and our  
371 analyses suggest that precipitation is a strong driver of local adaptation at thermal  
372 physiological traits.

373

374 Our analysis also suggests that temperature is an important driver of local adaptation  
375 in this system, but that extremes of temperature (encapsulated in minimum and  
376 maximum temperatures) are at least as strongly associated with local adaptation as is  
377 mean temperature. Again, this result is intuitive (natural selection from climate is  
378 likely stronger during extreme events than during normal daily temperatures) and  
379 agrees with results of empirical studies (38). Finally, the environmental variables with  
380 the weakest signals of local adaptation are Tcov (temperature seasonality), TminVar,  
381 and TmaxVar (variance of minimum and maximum daily temperatures, respectively).  
382 These variables represent predictable environmental variation occurring within an  
383 individual's lifespan and so are variables to which we might expect individuals to

384 develop plastic responses, rather than fixed differences; local adaptation to these  
385 variables would likely be reflected in reaction norms, rather than point values for  
386 traits. (49-51).

387

### 388 System-wide signal of local adaptation

389 The clear negative linear trend displayed in Fig. 3 is precisely what we would expect  
390 in a set of trait–environment combinations dominated by local adaptation. Migrant  
391 load (the negative effect of the immigration of less-locally adapted individuals) scales  
392 positively with immigration as well as with the strength of selection [see equation 5 in  
393 Polechová, Barton and Marion (52)]. The reason for this is that, when the strength of  
394 selection is moderately high, the environment will have a large effect on relevant  
395 traits, and therefore any immigrants coming from differing environments will be  
396 particularly maladapted and will therefore have a large and negative impact on the  
397 local phenotype. Thus, we expect trait–environment combinations with strong local  
398 adaptation to show strong effects of connectivity on the trait–environment relationship  
399 (52).

400

401 By setting up a statistical model in which the trait–environment relationship is altered  
402 by connectivity, we have allowed the possibility that the trait–environment  
403 relationship could be reversed as connectivity increases. Such an outcome is absurd  
404 from a theoretical perspective. In practice, however, our interaction coefficients were  
405 typically estimated to be around 0.36 times as strong as the main effect of  
406 environment. In this situation, reversal would only happen when connectivity values  
407 were more than 2.7 standard deviations beyond the mean (a situation that is  
408 exceedingly rare). Thus, encouragingly, our system wide analysis consistently

409 provides parameter estimates that are theoretically sensible, despite there being no  
410 constraint within the model for them to be so.

411

412 We used long-term climatic averages and found strong evidence that local adaptation  
413 dominates over plasticity in our trait–environment set. If we had included different  
414 environmental variables, such as the conditions the lizards had recently encountered,  
415 signals of plasticity may have been more apparent. Clearly environmental variables  
416 that are similar across generations should lead to local adaptation, while  
417 environmental variables that fluctuate within generations should have a strong  
418 influence on phenotypic plasticity.

419

#### 420 Phenotypic plasticity

421 The importance of accounting for phenotypic plasticity is, however, exemplified in  
422 our dataset by the relatively strong effect of precipitation of the driest quarter ( $P_{dry}$ )  
423 on the temperature at which maximum sprint speed is achieved ( $T_{opt}$ ) and on  
424 maximum sprint speed ( $R_{max}$ ) itself. On their own, these strong trait–environment  
425 relationships might be interpreted as evidence for local adaptation. Our analysis,  
426 however, suggests that the environmental effect is largely independent of  
427 connectivity, implying that variation in these traits is due to plasticity rather than  
428 genetic differentiation. Other work (27) has shown little temporal variation in  $T_{opt}$   
429 (within generations) despite clear geographic variation and this, together with our  
430 results, suggests that this trait undergoes developmental plasticity, but is fixed in adult  
431 lizards. In principle, this non-effect of connectivity could also arise due to selection  
432 that is so strong that it maintains local adaptation despite high levels of gene flow  
433 [i.e., immigrants are selected against so strongly that they do not contribute to the

434 recipient population (11)]. The trait–environment relationships for  $T_{opt}$  and  $R_{max}$   
435 are, however, weaker than those for some other traits (e.g.,  $CT_{max}$  and  $CT_{min}$ ) that  
436 show clear effects of connectivity, so extremely strong selection seems an unlikely  
437 explanation for the pattern we see here.

438

439 The generally weak evidence for plasticity in our dataset should not be considered  
440 weak evidence for plasticity in these traits. Indeed many of the physiological traits we  
441 use (e.g.,  $CT_{max}$ ) are notoriously plastic, responding reversibly on timescales ranging  
442 from hours to months (53, 54). That we do not see signals of plasticity in these traits  
443 here reflects our choice of environmental variables: long-term climatic variables,  
444 rather than short-term weather variables (such as the temperature in the week before  
445 an animal was collected). We chose these long-term variables precisely because we  
446 are interested in unearthing patterns of local adaptation, rather than patterns due to  
447 rapid, reversible plasticity.

448

#### 449 Caveats and challenges

450 Our intent here has been to point out the additional inference that can be drawn from  
451 data on geographic trait variation if we account for the effect of gene flow on trait  
452 differentiation. The idea that local adaptation is eroded by gene flow offers a novel  
453 way to identify the environmental drivers of local adaptation. Such a capacity is of  
454 fundamental interest, and is also sorely needed if we are to effectively manage the  
455 impacts of climate change. The methods we use here are, however, embryonic, and in  
456 the following we point out caveats and challenges for future work.

457

458 *Gene flow and connectivity*

459 Our approach requires a measure of gene flow across a landscape. Here we have used  
460 environmental connectivity as a proxy for gene flow. We chose connectivity because  
461 it can be calculated relatively easily for many species by using broad scale habitat  
462 mapping datasets [e.g., vegetation mapping from DERM (55)]. Of course, these  
463 measures of connectivity should be calculated at a scale relevant to the scale of  
464 dispersal of the species in question [as ours was, using dispersal rate data for  
465 *Lampropholis coggeri* from Singhal and Moritz (56)]. While connectivity measures  
466 will often correlate with gene flow, e.g., (57)], a measure of gene flow, rather than the  
467 flow of individuals, would be preferable. Such measures are increasingly becoming  
468 available with the rise of landscape genomics tools (e.g., 58), but may still be cost-  
469 prohibitive in many cases.

470

471 While there may be better measures of gene flow, our inference might also be  
472 improved by taking into account landscape heterogeneity in the environment. Gene  
473 flow, per se, does not erode local adaptation. Rather it is an influx of maladapted  
474 genes that erodes local adaptation. Thus, a better index of this “migrant load” may  
475 well be one in which connectivity is multiplied by a measure of environmental  
476 heterogeneity, where connectivity and heterogeneity are calculated over the same  
477 spatial scale (e.g., 31). An index such as this should, in principle be a better measure  
478 of migrant load than our simple measure of connectivity. The cost, however, is that  
479 this index would need to be calculated in a standardized manner for every  
480 environmental variable under consideration.

481

482 Clearly connectivity is an imperfect measure of migrant load. By using it, we  
483 implicitly assume that all migrants are equally maladapted and have equal fitness in

484 the recipient population. Nonetheless, connectivity should scale positively with  
485 migrant load, and our analysis using simple connectivity generated a coherent and  
486 intuitively sensible result. This is encouraging, suggesting that, in the absence of  
487 precise estimates of migrant load, a readily calculable connectivity metric may suffice  
488 to elucidate broad patterns.

489

490 *Linear trait–environment relationships, and covariation with connectivity*

491 Our method assumed that traits have a linear relationship to the environment (at least  
492 at the environmental scale across which we are looking). In many instances, this will  
493 be a reasonable null assumption: it seems unlikely, for example, that a trait such as  
494 desiccation resistance would be high in dry environments, low in moderately wet  
495 environments, and then high again in very wet environments. The assumption bears  
496 particular mention, however, in the situation where the connectivity index is strongly  
497 correlated with one or more of the other environmental variables being used. In our  
498 system, for example, AMP and Pdry are correlated with connectivity (Fig. S1). Where  
499 the environment–connectivity correlation is very strong, the interaction term in our  
500 model (Conn×Env) could be interpreted as a quadratic term for environment (i.e.,  
501 Env<sup>2</sup>). In these cases, it is possible that a strong connectivity interaction is, in fact,  
502 pointing to a non-linear trait–environment relationship. Thus, for environmental  
503 variables that correlate with connectivity (and there will always be some), careful  
504 consideration needs to be given to the possibility of a quadratic fitness function  
505 between trait and environment. In our case, it remains possible, for example, that the  
506 strong influence of precipitation on local adaptation in our system is spurious, and  
507 instead reflects non-linear relationships between optimal trait values and precipitation.  
508 We can, however, think of no obvious reason why thermal limits should respond

509 quadratically to precipitation, nor why desiccation rates and other physiological traits  
510 should also do so. Thus, in our case, we are inclined to accept the importance of this  
511 environmental variable in driving local adaptation in our system.

512

### 513 *Covariation between explanatory variables*

514 As in any multiple regression analysis, our capacity to make precise coefficient  
515 estimates diminishes if there is substantial covariation between our explanatory  
516 variables. If a sampling regime is being designed *de novo*, care should be taken to  
517 sample sites in such a way that covariation between environmental variables  
518 (including connectivity) is avoided as far as possible. Such an aim can be achieved by,  
519 for example, strategically exploiting latitudinal and altitudinal gradients.

520

### 521 *Multivariate traits and environments*

522 Here we examined one trait–environment combination at a time. Doing so may  
523 potentially miss relationships that only appear in multivariate analyses. For example,  
524 if two environmental variables are negatively correlated but both have a positive  
525 effect on a trait, it is possible that these countergradients can obscure the univariate  
526 relationship. Similar problems are encountered when examining response to selection  
527 over time (59) and, with our approach, may lead us to underestimate the number of  
528 important environmental drivers of local adaptation. Analysis incorporating multiple  
529 environmental predictors is possible, but such a model will rapidly become saturated  
530 with parameters. To minimize the problem of countergradients, again, care should be  
531 taken to sample environmental spaces in such a way as to minimize correlations  
532 between environmental variables.

533

534 An additional analytical challenge is to treat traits as multivariate. Here we have  
535 treated each measured trait as independent. In reality, however, traits covary and this  
536 covariance can have both genetic and environmental origins (60). As a corollary,  
537 selection acts on the multivariate trait, and causes populations to move in multivariate  
538 trait space (61). Consequently, local adaptation perhaps should be measured in a  
539 multivariate trait space rather than on a univariate basis. Such an aim, however,  
540 requires considerable theoretical development and may well require substantially  
541 more data. For now, however, we should be aware that we are collapsing our trait  
542 space, and each of our measured traits is not independent. For example, in our system  
543 there is a strong correlation between CT<sub>min</sub> and CT<sub>max</sub>, thus we should be aware  
544 that these two traits should not get equal weighting when we use our traits to rank  
545 environmental variables by their importance to local adaptation.

546

#### 547 *Neutral clines*

548 Finally, our approach should allow us to identify when geographic variation is a result  
549 of genetic variation. That is, it can weed out relationships that are driven by plasticity  
550 or habitat choice. Covariation between genotype and environment will often be the  
551 result of local adaptation, but can also arise for non-adaptive reasons, the most  
552 obvious being trait clines caused by the historical spread of population (62). In  
553 principle, and again, with careful attention to sample design (i.e., a sample design  
554 which minimizes the covariation between space and environment), it should be  
555 possible to separate spatial from environmental patterns.

556

#### 557 Conclusion



558 There is increasing urgency to identify populations that will act as suitable sources for  
559 targeted gene flow efforts in the face of climate change. To identify these populations,  
560 we need to know which traits influence sensitivity to climate and are locally adapted.  
561 Traditional approaches to unearthing local adaptation (reciprocal transplants and  
562 common garden experiments) are time consuming, and often cannot attribute  
563 adaptation to any particular environmental driver. Local adaptation is, however,  
564 undermined by gene flow, and we should be able to use this fact to sort patterns of  
565 local adaptation from patterns with other causes. Here we have demonstrated this  
566 approach: using connectivity as a proxy for gene flow, and looking for its effect on  
567 trait–environment relationships. Our analysis, using a species of lizard from  
568 Australia’s Wet Tropics rainforest, suggests the approach has merit: the results we  
569 achieve are coherent and suggest local adaptation is the overwhelming signal in the  
570 set of trait–environment relationships tested. As well as implying a strong role for  
571 local adaptation, we have effectively ranked environmental drivers of local  
572 adaptation, finding evidence that precipitation and temperature are important  
573 environmental variables with regard to local adaptation in our system. Our analysis  
574 also suggests that some traits exhibit strong plastic responses to the environment,  
575 particularly in response to precipitation of the driest quarter and the seasonality of  
576 temperature and precipitation. These specific results will likely apply to other species  
577 that are phylogenetically or ecologically similar to our focal species, but the method  
578 has the potential to apply much more broadly. Analytical and sampling challenges  
579 remain, however, and we point to avenues whereby the method can be improved.  
580 Given the potential of this method to provide evidence of local adaptation, and to  
581 provide rapid ranking of the climatic drivers of local adaptation, assessment of the  
582 method in a broader array of systems is warranted.

583

584 **Acknowledgments**

585 This work was funded by the Tropical Landscapes Joint Venture, the Wet Tropics  
586 Management Authority, an Australian Postgraduate Award to SLM, and the  
587 Australian Research Council (DP130100318, FT160100198). All physiological data  
588 used in these analyses were collected by Amberlee Hatcher at James Cook University.  
589 The authors are extremely grateful for her patience and attention to detail while  
590 undertaking this task.

591 **References**

- 592 1. Reznick DN & Ghalambor CK (2001) The population ecology of  
593 contemporary adaptations: what empirical studies reveal about the conditions  
594 that promote adaptive evolution. *Genetica* 112:183-198.
- 595 2. Reznick DN, Shaw FH, Rodd FH, & Shaw RG (1997) Evaluation of the rate  
596 of evolution in natural populations of guppies (*Poecilia reticulata*). *Science*  
597 275(5308):1934–1937.
- 598 3. Losos JB, Warheit KI, & Schoener TW (1997) Adaptive differentiation  
599 following experimental island colonization in *Anolis* lizards. *Nature*  
600 387(6628):70–73.
- 601 4. Stuart YE, *et al.* (2014) Rapid evolution of a native species following invasion  
602 by a congener. *Science* 346(6208):463–466.
- 603 5. Richardson JL, Urban MC, Bolnick DI, & Skelly DK (2014) Microgeographic  
604 adaptation and the spatial scale of evolution. *Trends Ecol Evol* 29(3):165–176.
- 605 6. Stockwell CA, Hendry AP, & Kinnison MT (2003) Contemporary evolution  
606 meets conservation biology. *Trends Ecol. Evol.* 18(2):94-101.
- 607 7. Kelly MW, Sanford E, & Grosberg RK (2012) Limited potential for  
608 adaptation to climate change in a broadly distributed marine crustacean.  
609 *Proceedings of the Royal Society B-Biological Sciences* 279(1727):349–356.
- 610 8. Olsson M & Uller T (2003) Thermal environment, survival and local  
611 adaptation in the common frog, *Rana temporaria*. *Evol Ecol Res* 5(3):431–  
612 437.
- 613 9. Sinervo B, *et al.* (2010) Erosion of Lizard Diversity by Climate Change and  
614 Altered Thermal Niches. *Science* 328(5980):894–899.

- 615 10. Hoffmann AA & Sgrò CM (2011) Climate change and evolutionary  
616 adaptation. *Nature* 470(7335):479–485.
- 617 11. Kawecki TJ & Ebert D (2004) Conceptual issues in local adaptation. *Ecol Lett*  
618 7(12):1225–1241.
- 619 12. Reznick DN & Travis J (1996) The empirical study of adaptation in natural  
620 populations. *Adaptation*, (Academic Press, San Diego, CA), pp 243–289.
- 621 13. Blanquart F, Kaltz O, Nuismer SL, & Gandon S (2013) A practical guide to  
622 measuring local adaptation. *Ecology Letters* 16:1195-1205.
- 623 14. Wright JW, Stanton ML, & Scherson R (2006) Local adaptation to serpentine  
624 and non-serpentine soils in *Collinsia sparsiflora*. *Evol Ecol Res* 8(1):1–21.
- 625 15. García-Ramos G & Kirkpatrick M (1997) Genetic models of adaptation and  
626 gene flow in peripheral populations. *Evolution* 51(1):21–28.
- 627 16. Wright S (1931) Evolution in Mendelian populations. *Genetics* 16(2):0097–  
628 0159.
- 629 17. Dhondt AA, Adriaensen F, Matthysen E, & Kempenaers B (1990)  
630 Nonadaptive Clutch Sizes in Tits. *Nature* 348(6303):723–725.
- 631 18. Storfer A, Cross J, Rush V, & Caruso J (1999) Adaptive coloration and gene  
632 flow as a constraint to local adaptation in the streamside salamander,  
633 *Ambystoma barbouri*. *Evolution* 53(3):889–898.
- 634 19. Sandoval CP (1994) The Effects of the Relative Geographic Scales of Gene  
635 Flow and Selection on Morph Frequencies in the Walking-Stick *Timema*  
636 *christinae*. *Evolution* 48(6):1866–1879.
- 637 20. IPCC (2014) *Climate Change 2014: Synthesis Report. Contribution of*  
638 *Working Groups I, II and III to the Fifth Assessment Report of the*

- 639            *Intergovernmental Panel on Climate Change* (IPCC, Geneva, Switzerland) p  
640            151.
- 641    21.    Meehl GA, *et al.* (2007) Global Climate Projections. in *Climate Change 2007:*  
642            *The Physical Science Basis. Contribution of Working Group I to the Fourth*  
643            *Assessment Report of the Intergovernmental Panel on Climate Change*, eds  
644            Solomon S, Qin D, Manning M, Chen Z, Marquis M, Averyt KB, Tignor M,  
645            & Miller HL (Cambridge University Press, Cambridge, United Kingdom and  
646            New York, NY, USA).
- 647    22.    Aitken SN & Whitlock MC (2013) Assisted gene flow to facilitate local  
648            adaptation to climate change. *Annu Rev Ecol Evol Syst* 44:367–388.
- 649    23.    Williams SE, Shoo LP, Isaac JL, Hoffmann AA, & Langham G (2008)  
650            Towards an integrated framework for assessing the vulnerability of species to  
651            climate change. *PLoS Biol* 6(12):2621–2626.
- 652    24.    Weeks AR, *et al.* (2011) Assessing the benefits and risks of translocations in  
653            changing environments: a genetic perspective. *Evolutionary Applications*  
654            4(6):709–725.
- 655    25.    Kelly EL & Phillips BL (2016) Targeted gene flow for conservation. *Cons.*  
656            *Biol.* 30:259-267.
- 657    26.    Wilson SK & Swan G (2010) *A complete guide to reptiles of Australia* (Reed  
658            New Holland, Sydney, N.S.W.) p 512 pp.
- 659    27.    Llewelyn J, Macdonald S, Hatcher A, Moritz C, & Phillips BL (2016)  
660            Intraspecific variation in climate-relevant traits in a tropical rainforest skink.  
661            *Diversity and Distributions* 22(10):1000-1012.

- 662 28. Phillips BL, Llewelyn J, Hatcher A, Macdonald S, & Moritz C (2014) Do  
663 evolutionary constraints on thermal performance manifest at different  
664 organizational scales? *J. Evol. Biol.* 27:2687-2694.
- 665 29. Easterling DR, *et al.* (2000) Climate extremes: Observations, modeling, and  
666 impacts. *Science* 289(5487):2068-2074.
- 667 30. Parmesan C, Root TL, & Willig MR (2000) Impacts of extreme weather and  
668 climate on terrestrial biota. *B Am Meteorol Soc* 81(3):443–450.
- 669 31. Macdonald SL, Llewelyn J, Moritz C, & Phillips BL (2017) Peripheral isolates  
670 as sources of adaptive diversity under climate change. *Frontiers in Ecology*  
671 *and Evolution* 5.
- 672 32. R Core Team (2015) R: A Language and Environment for Statistical  
673 Computing (R Foundation for Statistical Computing, Vienna, Austria).
- 674 33. Llewelyn J, Macdonald SL, Hatcher A, Moritz C, & Phillips BL (submitted)  
675 Intraspecific variation in climate-relevant traits in a tropical rainforest skink.
- 676 34. Wegener JE, Gartner GEA, & Losos JB (2014) Lizard scales in an adaptive  
677 radiation: variation in scale number follows climatic and structural habitat  
678 diversity in *Anolis* lizards. *Biol J Linn Soc* 113(2):570–579.
- 679 35. Klaczko J, Ingram T, & Losos J (2015) Genitals evolve faster than other traits  
680 in *Anolis* lizards. *Journal of Zoology* 295(1):44–48.
- 681 36. Bogert CM (1949) Thermoregulation in Reptiles, a Factor in Evolution.  
682 *Evolution* 3(3):195–211.
- 683 37. Hoffmann AA (2010) Physiological climatic limits in *Drosophila*: patterns  
684 and implications. *J Exp Biol* 213(6):870–880.

- 685 38. Clusella-Trullas S, Blackburn TM, & Chown SL (2011) Climatic Predictors of  
686 Temperature Performance Curve Parameters in Ectotherms Imply Complex  
687 Responses to Climate Change. *Am Nat* 177(6):738–751.
- 688 39. Angilletta MJ (2009) *Thermal adaptation: a theoretical and empirical*  
689 *synthesis* (Oxford University Press, Oxford; New York) pp xii, 289 p. 281 col.  
690 plate.
- 691 40. Goodman BA, Miles DB, & Schwarzkopf L (2008) Life on the Rocks: Habitat  
692 Use Drives Morphological and Performance Evolution in Lizards. *Ecology*  
693 89(12):3462–3471.
- 694 41. Huey RB & Webster TP (1976) Thermal Biology of *Anolis* Lizards in a  
695 Complex Fauna: the *crisatellus* Group on Puerto-Rico. *Ecology* 57(5):985–  
696 994.
- 697 42. Crowley SR (1987) The Effect of Desiccation Upon the Preferred Body-  
698 Temperature and Activity Level of the Lizard *Sceloporus undulatus*. *Copeia*  
699 (1):25–32.
- 700 43. Jones SM, Waldschmidt SR, & Potvin MA (1987) An Experimental  
701 Manipulation of Food and Water - Growth and Time-Space Utilization of  
702 Hatchling Lizards (*Sceloporus undulatus*). *Oecologia* 73(1):53–59.
- 703 44. Lorenzon P, Clobert J, Oppliger A, & John-Alder H (1999) Effect of water  
704 constraint on growth rate, activity and body temperature of yearling common  
705 lizard (*Lacerta vivipara*). *Oecologia* 118(4):423–430.
- 706 45. Stamps J & Tanaka S (1981) The Influence of Food and Water on Growth-  
707 Rates in a Tropical Lizard (*Anolis aeneus*). *Ecology* 62(1):33–40.
- 708 46. Myers VI & Heilman MD (1969) Thermal Infrared for Soil Temperature  
709 Studies. *Photogramm Eng* 35(10):1024–1032.

- 710 47. Martin TL & Huey RB (2008) Why "Suboptimal" is optimal: Jensen's  
711 inequality and ectotherm thermal preferences. *Am Nat* 171(3):E102–E118.
- 712 48. Bonebrake TC & Mastrandrea MD (2010) Tolerance adaptation and  
713 precipitation changes complicate latitudinal patterns of climate change  
714 impacts. *Proc Natl Acad Sci U S A* 107(28):12581–12586.
- 715 49. Kingsolver JG & Huey RB (1998) Evolutionary analyses of morphological  
716 and physiological plasticity in thermally variable environments. *Am Zool*  
717 38(3):545–560.
- 718 50. Gilchrist GW (1995) Specialists and Generalists in Changing Environments. I.  
719 Fitness Landscapes of Thermal Sensitivity. *Am Nat* 146(2):252–270.
- 720 51. Phillips BL, *et al.* (2016) Heat hardening in a tropical lizard: geographic  
721 variation explained by the predictability and variance in environmental  
722 temperatures. *Func. Ecol.* 30:1161-1168.
- 723 52. Polechová J, Barton N, & Marion G (2009) Species' range: adaptation in space  
724 and time. *Am Nat* 174(5):E186–E204.
- 725 53. Seebacher F (2005) A review of thermoregulation and physiological  
726 performance in reptiles: what is the role of phenotypic flexibility? *Journal of*  
727 *comparative physiology. B, Biochemical, systemic, and environmental*  
728 *physiology* 175(7):453-461.
- 729 54. Llewelyn J, Macdonald S, Moritz C, & Phillips BL (2017) Thermoregulatory  
730 behaviour explains countergradient variation in the upper thermal limit of a  
731 rainforest skink. *Oikos* 126(5):748-757.
- 732 55. DERM (2011) Queensland Department of Environment and Resource  
733 Management, regional ecosystem mapping version 7.0.



- 734 56. Singhal S & Moritz C (2012) Strong selection against hybrids maintains a  
735 narrow contact zone between morphologically cryptic lineages in a rainforest  
736 lizard. *Evolution* 66(5):1474–1489.
- 737 57. Palmer SCF, Coulon A, & Travis MJJ (2011) Introducing a ‘stochastic  
738 movement simulator’ for estimating habitat connectivity. *Methods in Ecology  
739 and Evolution* 2(3):258-268.
- 740 58. Petkova D, Novembre J, & Stephens M (2016) Visualizing spatial population  
741 structure with estimated effective migration surfaces. *Nature Genetics*  
742 48(1):94-100.
- 743 59. Merila J, Sheldon BC, & Kruuk LEB (2001) Explaining stasis:  
744 microevolutionary studies in natural populations. *Genetica* 112:199-222.
- 745 60. Lynch M & Walsh B (1998) *Genetics and Analysis of Quantitative Traits*  
746 (Sinauer Associates, Sunderland, MA).
- 747 61. Blows MW (2007) A tale of two matrices: multivariate approaches in  
748 evolutionary biology. *J. Evol. Biol.* 20(1):1-8.
- 749 62. Phillips BL, Brown GP, & Shine R (2010) Life-history evolution in range-  
750 shifting populations. *Ecology* 91(6):1617-1627.
- 751 56. Jones, D.A., Wang, W. & Fawcett, R. (2009) High-quality spatial climate  
752 data-sets for Australia. *Australian Meteorological and Oceanographic  
753 Journal*, 58, 233–248.
- 754 57. McMahon, J.P., Hutchinson, M.F., Nix, H.A. & Ord, K.D. (1995). *ANUCLIM  
755 user's guide*. Centre for Resource and environmental Studies, Australian  
756 National University, Canberra.

- 757 58. Storlie, C.J., Phillips, B.L., VanDerWal, J.J. & Williams, S.E. (2013)  
758 Improved spatial estimates of climate predict patchier species distributions.  
759 *Diversity and Distributions*, **19**, 1106–1113.
- 760 59. Graham, Catherine H., VanDerWal, Jeremy, Phillips, Steven J., Moritz, Craig,  
761 and Williams, Stephen E. (2010). Dynamic refugia and species persistence:  
762 tracking spatial shifts in habitat through time. *Ecography*, 33(6):1062-1069.  
763  
764  
765

766 **Figure Captions**

767

768 **Figure 1.** Graphs showing the concepts illustrated by plotting a set of trait–environment  
769 coefficients (e.g., the coefficient from a linear model examining the effect of annual mean site  
770 temperature on the sprint performance of organisms from that site:  $B_{env}$ , x-axis) and the  
771 corresponding environment–connectivity interaction coefficients ( $B_{int}$ , y-axis). Broad grey  
772 line represents the approximate area in which these points would fall. A) Phenotypic plasticity  
773 is suggested when trait–environment relationships are strong, but are not influenced by  
774 connectivity. B) Local adaptation is suggested when increasing connectivity diminishes the  
775 relationship between the environment and the trait. C) The effect of the environment is  
776 enhanced by connectivity. This latter pattern might arise in organisms that are highly mobile  
777 and can actively move to their ideal environment, thus avoiding the selective pressures that  
778 would lead to local adaptation.

779

780 **Figure 2.** Map of the southern Australian Wet Tropics bioregion, showing the distribution of  
781 rainforest in green and the sampling locations as black dots.

782

783 **Figure 3.** Scatterplot showing the results of 99 linear models run to assess the relationship  
784 between each trait–environment pair, and the environment–connectivity interaction. Trait–  
785 environment coefficients ( $B_{env}$ ) are on the x-axis, and environment–connectivity interaction  
786 coefficients ( $B_{int}$ ) are on the y-axis. Local adaptation is suggested when these two parameters  
787 are opposite in sign: in trait–environment pairs in which a strong environmental effect is  
788 eroded by increasing connectivity.

789

790 **Figure 4.** Heatmap showing the relative rankings of climate variables (rows) and  
791 morphological and physiological traits (columns). The matrix has been sorted (by reciprocal  
792 averaging) and coloured according to the strength of local adaptation, with higher values  
793 coloured red and being sorted to the top/left. See Tables S1 and S2 for explanations of the  
794 trait and environmental variables used.

795  $L$  = local adaptation index:  $-B_{env} \times B_{int}$

796

797

798

799

800

801 **Figures**

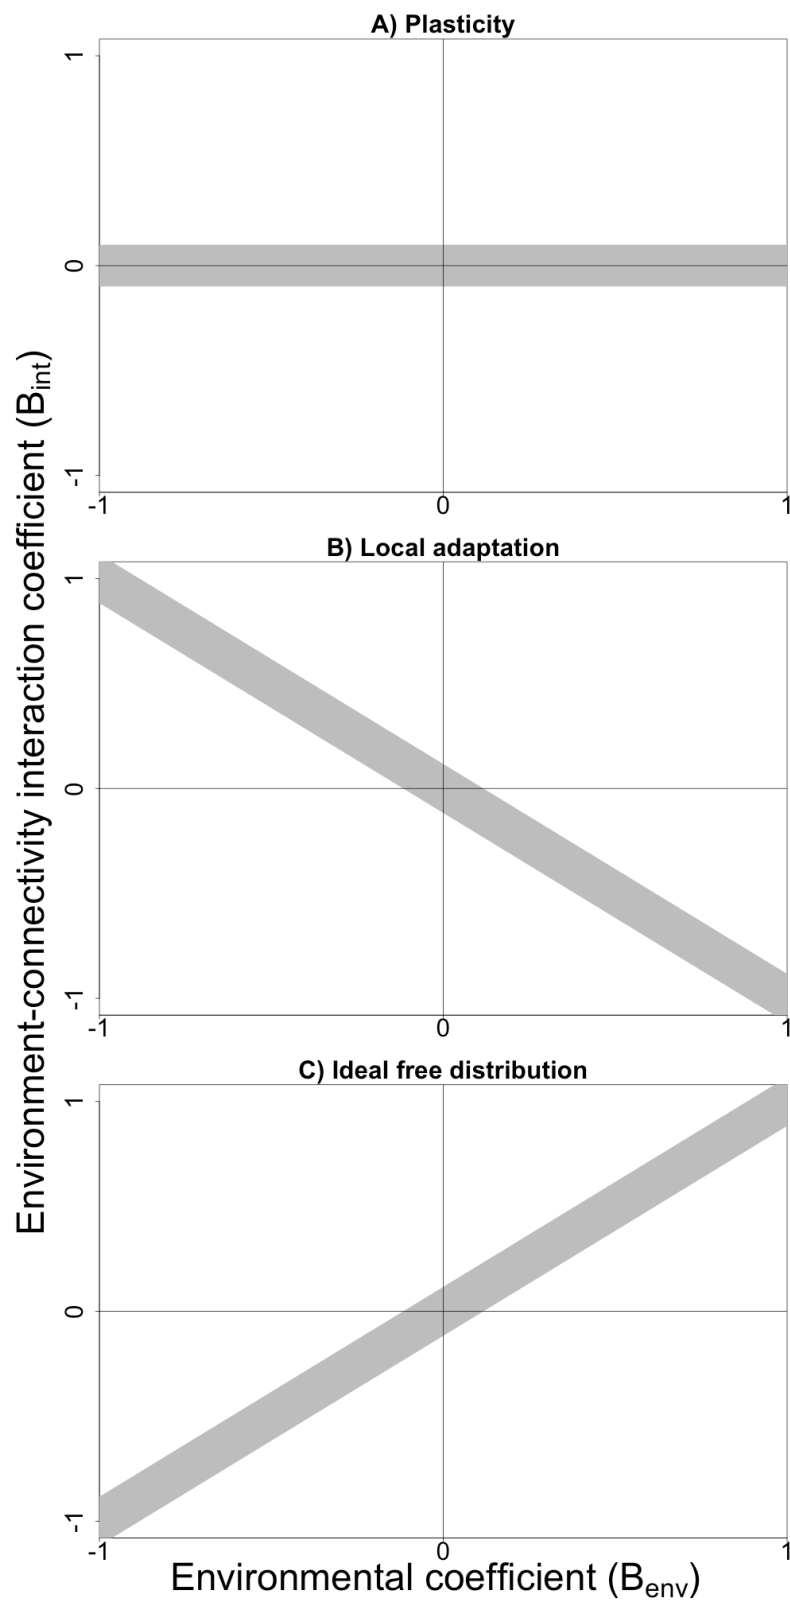

802

803 **Figure 1**

804

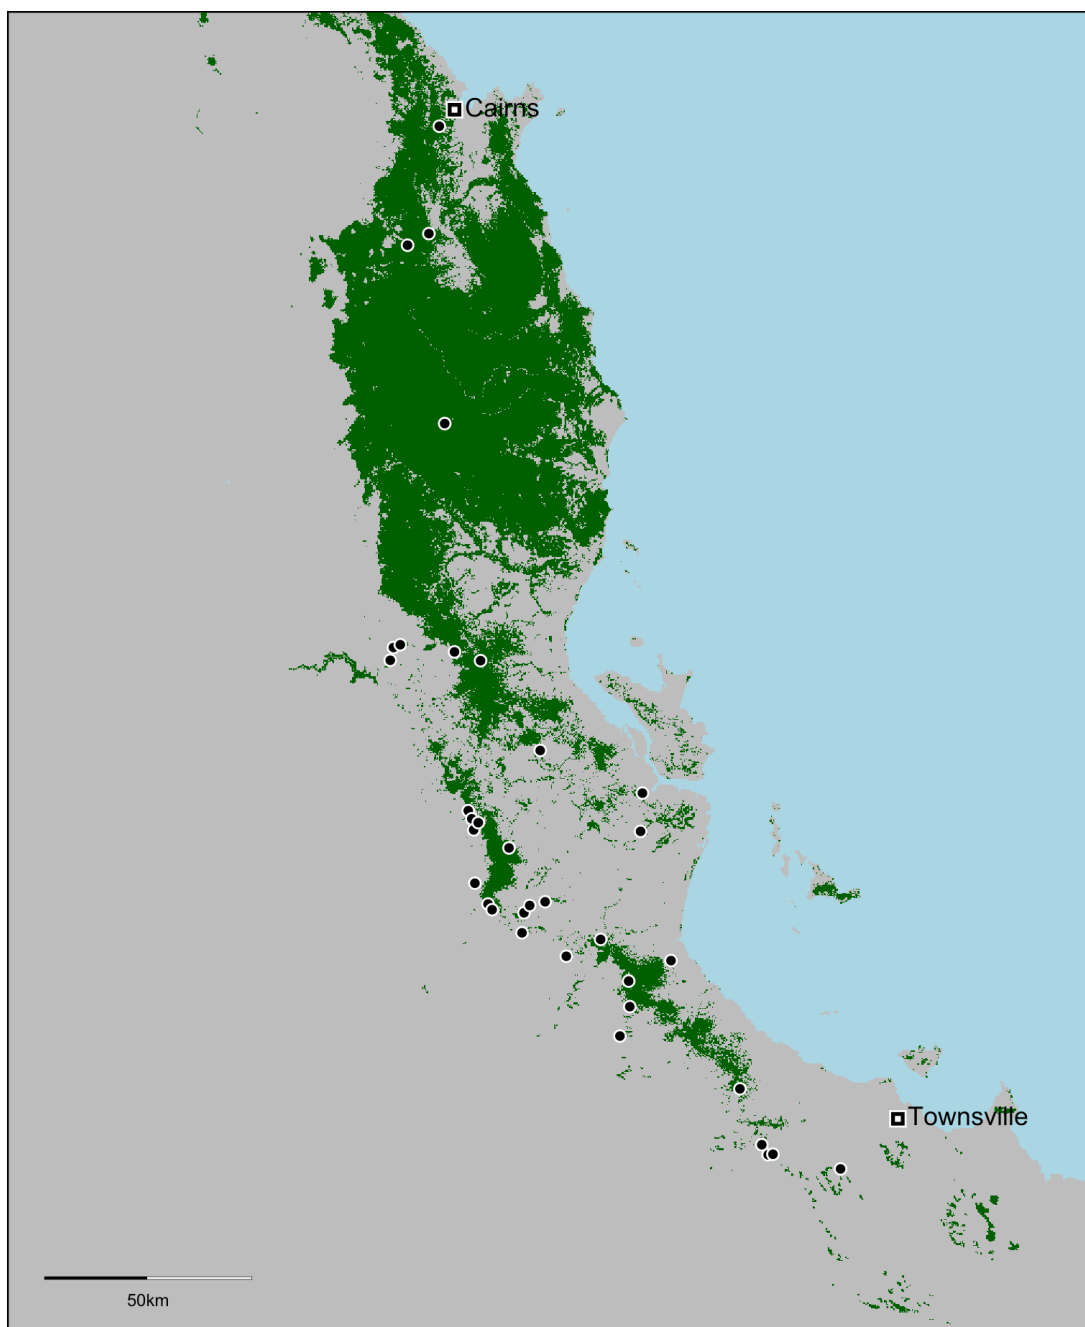

805

806 **Figure 2**

807

808

809

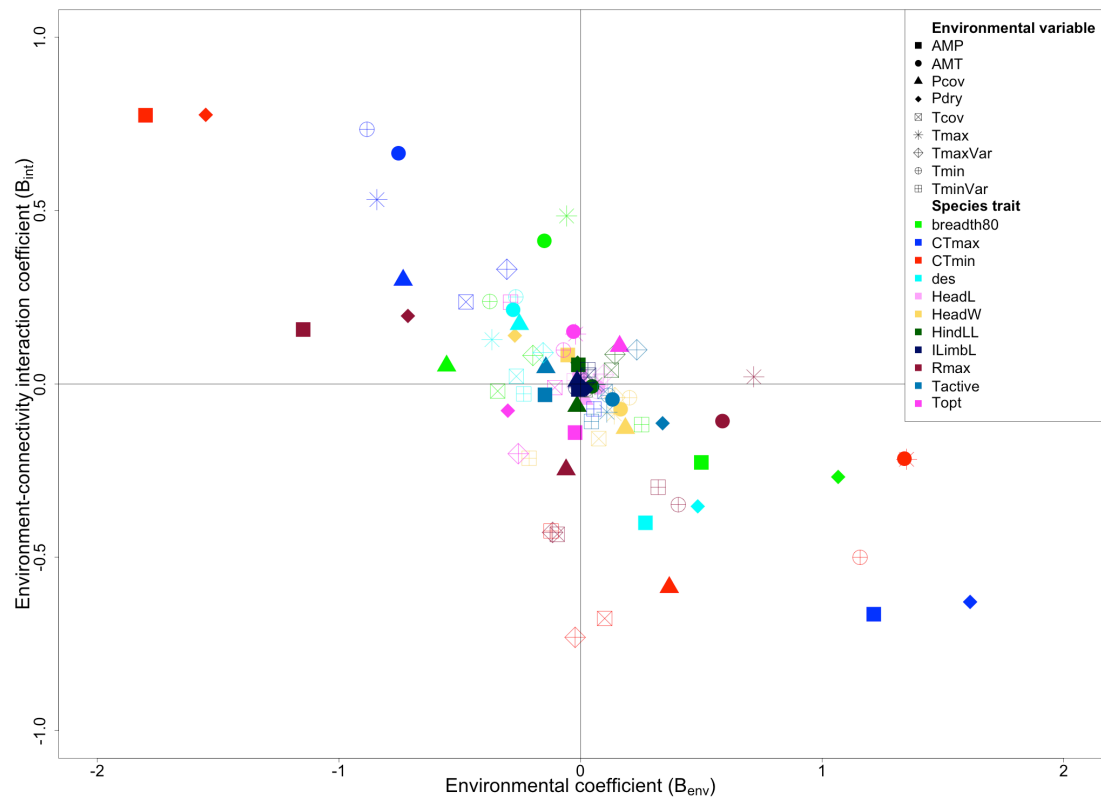

810

811

812

813

**Figure 3**

|         | CTmin       | CTmax      | breath80    | Rmax        | des         | HeadW       | Tactive     | HindLL      | HeadL       | ILimBL      | Topt        |
|---------|-------------|------------|-------------|-------------|-------------|-------------|-------------|-------------|-------------|-------------|-------------|
| AMP     | L = 1.3955  | L = 0.8062 | L = 0.1132  | L = 0.1802  | L = 0.1076  | L = 0.0044  | L = -0.0046 | L = 0.0005  | L = 0.0001  | L = -0.0001 | L = -0.0032 |
| Pdry    | L = 1.2042  | L = 1.0140 | L = 0.2861  | L = 0.1401  | L = 0.1713  | L = 0.0379  | L = 0.0385  | L = 0.0007  | L = 0.0002  | L = 0.0004  | L = -0.0232 |
| Tmin    | L = 0.5787  | L = 0.6494 | L = 0.0894  | L = 0.1409  | L = 0.0673  | L = 0.0081  | L = 0.0038  | L = 0.0004  | L = 0.0015  | L = -0.0002 | L = 0.0069  |
| AMT     | L = 0.2890  | L = 0.5014 | L = 0.0619  | L = 0.0630  | L = 0.0597  | L = 0.0121  | L = 0.0059  | L = 0.0003  | L = 0.0007  | L = -0.0000 | L = 0.0044  |
| Tmax    | L = 0.2932  | L = 0.4480 | L = 0.0281  | L = -0.0148 | L = 0.0467  | L = 0.0121  | L = 0.0089  | L = 0.0001  | L = 0.0003  | L = -0.0000 | L = 0.0029  |
| Pcov    | L = 0.2155  | L = 0.2200 | L = 0.0290  | L = -0.0148 | L = 0.0435  | L = 0.0237  | L = 0.0068  | L = -0.0009 | L = 0.0006  | L = 0.0001  | L = -0.0176 |
| Tcov    | L = 0.0676  | L = 0.1122 | L = -0.0071 | L = -0.0418 | L = 0.0058  | L = 0.0119  | L = 0.0022  | L = -0.0051 | L = -0.0007 | L = -0.0008 | L = -0.0011 |
| TmaxVar | L = -0.0164 | L = 0.1009 | L = 0.0162  | L = -0.0496 | L = 0.0139  | L = 0.0056  | L = -0.0229 | L = -0.0121 | L = -0.0026 | L = -0.0000 | L = -0.0519 |
| TminVar | L = -0.0518 | L = 0.0040 | L = 0.0297  | L = 0.0957  | L = -0.0068 | L = -0.0457 | L = 0.0049  | L = 0.0003  | L = 0.0002  | L = -0.0012 | L = 0.0683  |

814

815

816

**Figure 4**
